# Supplementary material for: Phase I study of afatinib combined with nintedanib in patients with advanced solid tumours
Source: PubMed Central journal article supplement (PMC4815889; doi:10.1038/bjc.2015.374), 2015-10-29
Supplement: bjc2015374x2.pdf [file bjc2015374x2.pdf]

**Supplementary Table 1. Treatment-related AEs by NCI-CTCAE grade<sup>a</sup> occurring in >10% of patients in the expansion phase**

| <b>AE, n (%)</b>      | <b>Grade 1</b> | <b>Grade 2</b> | <b>Grade 3</b> | <b>Total<br/>(n = 25)</b> |
|-----------------------|----------------|----------------|----------------|---------------------------|
| Any AE                | 2 (8)          | 11 (44)        | 11 (44)        | 24 (96)                   |
| Diarrhoea             | 7 (28)         | 8 (32)         | 7 (28)         | 22 (88)                   |
| Rash                  | 11 (44)        | 3 (12)         | 0 (0)          | 14 (56)                   |
| Asthenia              | 5 (20)         | 6 (24)         | 2 (8)          | 13 (52)                   |
| Decreased appetite    | 6 (24)         | 5 (20)         | 1 (4)          | 12 (48)                   |
| Nausea                | 6 (24)         | 5 (20)         | 1 (4)          | 12 (48)                   |
| Rhinitis              | 6 (24)         | 0 (0)          | 0 (0)          | 6 (24)                    |
| Dry skin              | 5 (20)         | 0 (0)          | 0 (0)          | 5 (20)                    |
| Hypomagnesaemia       | 5 (20)         | 0 (0)          | 0 (0)          | 5 (20)                    |
| Mucosal inflammation  | 3 (12)         | 2 (8)          | 0 (0)          | 5 (20)                    |
| Muscle spasms         | 5 (20)         | 0 (0)          | 0 (0)          | 5 (20)                    |
| Skin fissures         | 5 (20)         | 0 (0)          | 0 (0)          | 5 (20)                    |
| Vomiting              | 2 (8)          | 2 (8)          | 1 (4)          | 5 (20)                    |
| Weight decreased      | 4 (16)         | 1 (4)          | 0 (0)          | 5 (20)                    |
| Dysphonia             | 4 (16)         | 0 (0)          | 0 (0)          | 4 (16)                    |
| Hypokalaemia          | 2 (8)          | 0 (0)          | 2 (8)          | 4 (16)                    |
| Rhinorrhoea           | 4 (16)         | 0 (0)          | 0 (0)          | 4 (16)                    |
| Dry mouth             | 3 (12)         | 0 (0)          | 0 (0)          | 3 (12)                    |
| Epistaxis             | 3 (12)         | 0 (0)          | 0 (0)          | 3 (12)                    |
| Hepatocellular injury | 1 (4)          | 0 (0)          | 2 (8)          | 3 (12)                    |

Abbreviations: AE=adverse event; NCI-CTCAE=National Cancer Institute Common Terminology Criteria for Adverse Events.

<sup>a</sup>No Grade 4 or 5 treatment-related AEs were observed.
